# Supplementary material for: E Se tea alleviates acetaminophen-induced liver injury by activating the Nrf2 signaling pathway
Source: Royal Society of Chemistry journal article supplement (doi:10.1039/d1fo02491d), 2022-01-01

## Western blot

### 1, $\beta$ -actin (42KDA)

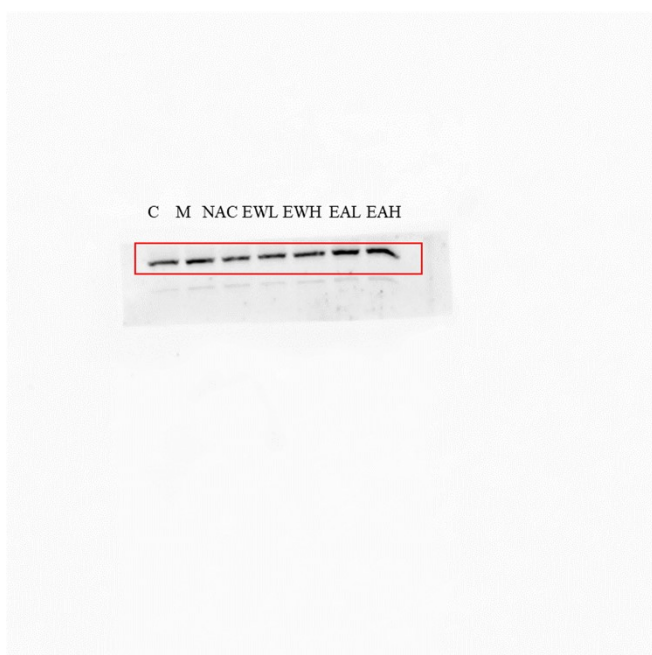

### 2, keap1 (70KDA)

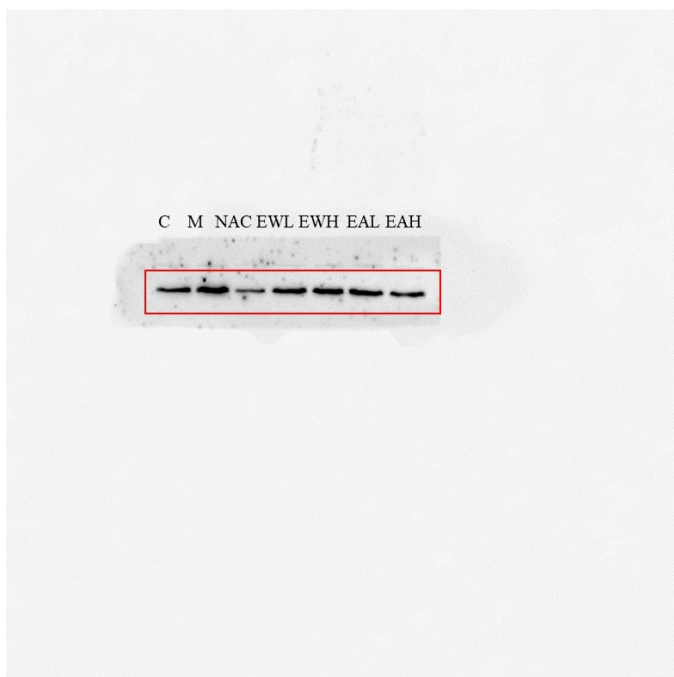

### 3, Cytoplasmic Nrf2 (110KDA)

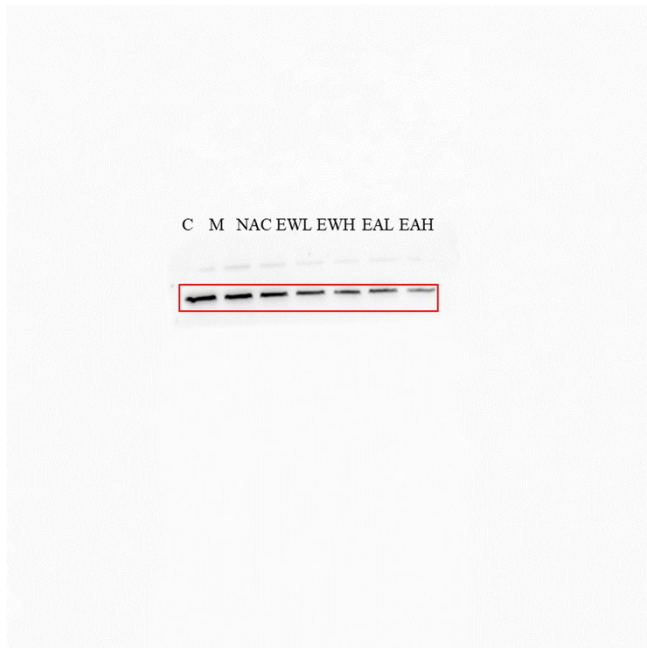

### 4, Lamin B (68KDA)

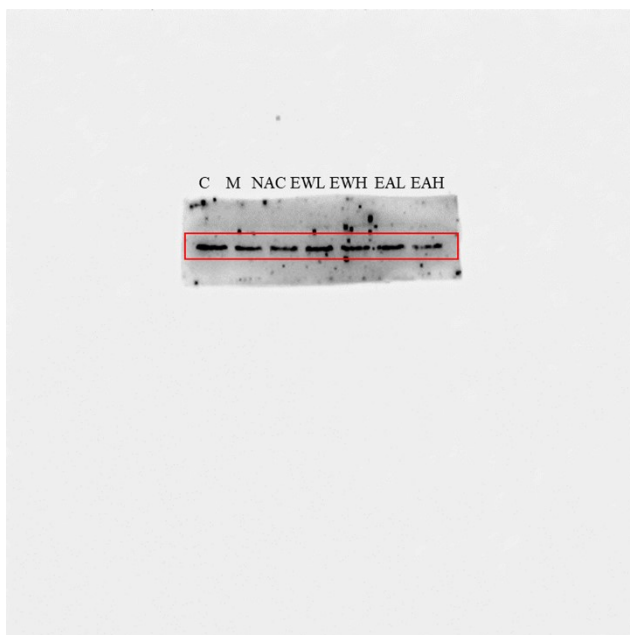

**5, Nuclear Nrf2 (110KDA)**

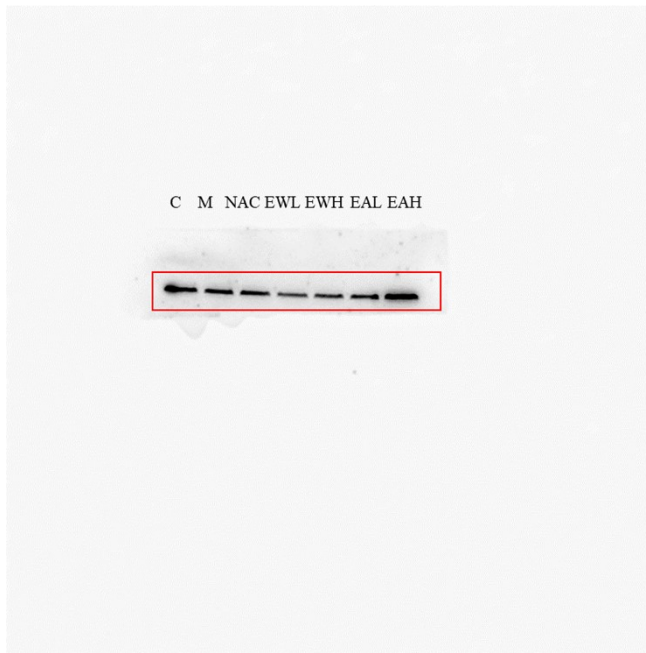

**6,  $\beta$ -actin (42KDA)**

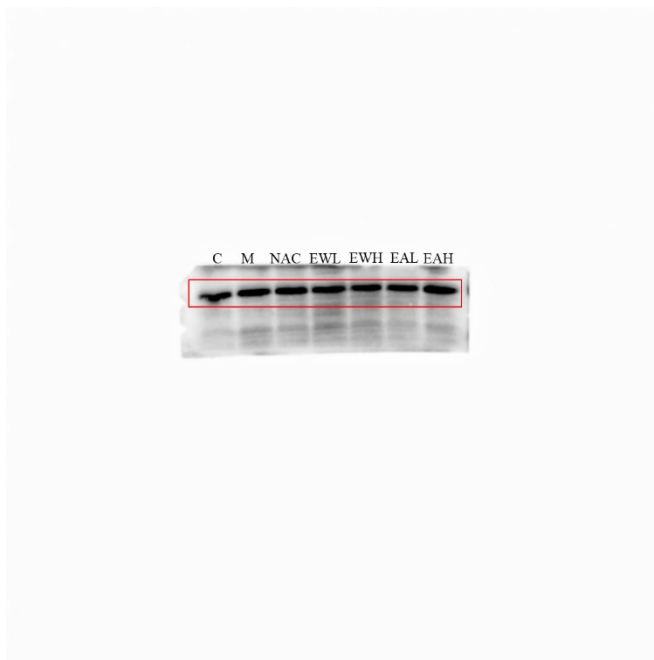

**7, HO-1 (33KDA)**

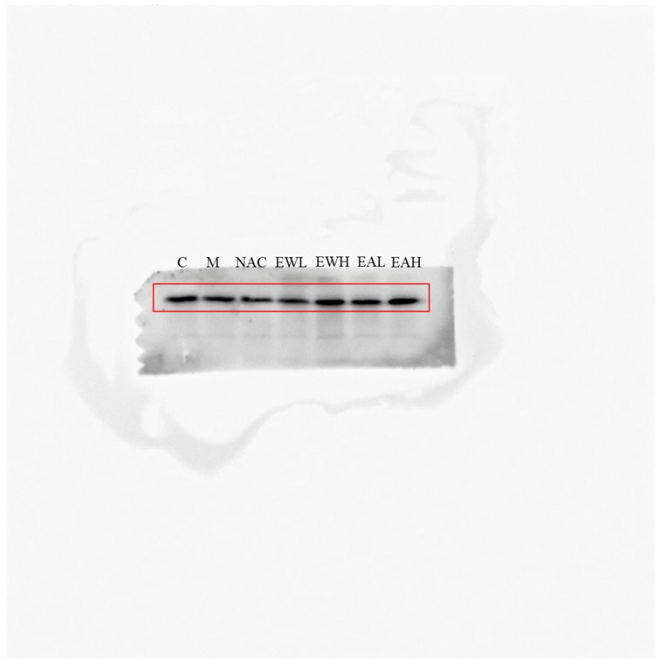

**8, NQO1 (31KDA)**

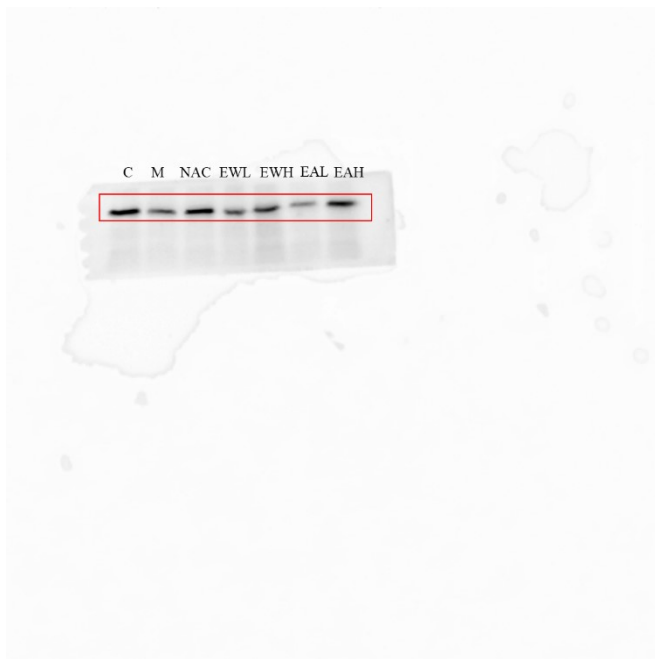

Supplement: d1fo02491d1.pdf [file d1fo02491d1.pdf]
